# Supplementary material for: Application of particle swarm optimization for gravity inversion of 2.5-D sedimentary basins using variable density contrast
Source: Copernicus journal article supplement (doi:10.5194/gi-2016-10), 2016-08-25
Supplement: Supplementary file [file gi-2016-10-AC6-supplement.pdf]

1     **Application of particle swarm optimization for gravity inversion of 2.5-D**  
2                     **sedimentary basins using variable density contrast**

3                     Kunal Kishore Singh and Upendra Kumar Singh\*

4                     *Department of Applied Geophysics, Indian School of Mines, Dhanbad-826004, India*

5                     Correspondence: \*[upendra.ism@gmail.com](mailto:upendra.ism@gmail.com)

6     **Abstract**

7     Particle swarm optimization (PSO) is a global optimization technique that works similarly to  
8     swarms of birds searching for food. A Matlab code in PSO algorithm is developed to estimate  
9     the depth to the bottom of a 2.5-D sedimentary basin and coefficients of regional background  
10    from observed gravity anomalies. The density contrast within the source is assumed to be  
11    varying parabolically with depth. Initially, the PSO algorithm is applied on synthetic data  
12    with and without some Gaussian noise and its validity is tested by calculating the depth of the  
13    Gediz Graben, Western Anatolia and Godavari sub-basin, India. The Gediz Graben consists  
14    of Neogen sediments and the metamorphic complex forms the basement of the Graben. A  
15    thick uninterrupted sequence of Permian-Triassic and partly Jurassic and Cretaceous  
16    sediments forms the Godavari sub-basin. **The PSO results are better correlated with results**  
17    **obtained by Marquardt method and borehole information.**

18    **Keywords:** Particle swarm optimization, Sedimentary basin, Gravity anomaly, Inversion,  
19    Gaussian noise.

20  
21    **Introduction**

22    Gravity method is a natural source method which helps in locating masses of greater or lesser  
23    density than the surrounding formations. It is used as a reconnaissance survey in hydrocarbon  
24    exploration. Sedimentary basins, which are characterized by negative gravity anomalies, are

25 the location of almost all of the world's hydrocarbon reserves. Interpretation of gravity data is  
26 a mathematical process of trying to optimize the parameters of the initial model in order to  
27 get a good match to the observed data. Interpretation of gravity data is always associated with  
28 the ambiguity problem. Ambiguity in gravity anomalies can be overcome by assigning a  
29 mathematical geometry to the anomaly causing body with a known density contrast (Rama  
30 Rao and Murthy, 1978). Bott (1960) used stacked prism model to describe the cross-section  
31 of a sedimentary basin, whereas Talwani (1959) used the polygonal model to describe source  
32 geometry. The parabolic density function is used to remove the complications associated with  
33 exponential (Cordell, 1973), cubic (Garcia-Abdeslem, 2005) and quadratic (Gallardo-  
34 Delgado et al., 2003) density functions. The Marquardt inversion through residual gravity  
35 anomalies delineates the structure of a sedimentary basin by estimating regional background  
36 (Chakravarthi and Sundararajan, 2007). Several authors have developed 2D/2.5D local  
37 optimization techniques over the 2D/2.5D sedimentary basin (Annechione et al., 2001;  
38 Barbosa et. al, 1999; Bhattacharya and Navolio, 1975; Gadirov et. al, 2016; Litinsky, 1989;  
39 Morgan and Grant, 1963; Murthy et al., 1988; Murthy, and Rao, 1989; Won and Bavis, 1987)  
40 to interpret gravity anomalies with constant density function. In many publications over 3D  
41 gravity field computation with an approximation of geological bodies by 3D polygonal  
42 horizontal prism was applied (Eppelbaum and Khesin, 2004; Khesin et al. 1996). Rao (1990)  
43 used a quadratic density function, which is comparatively reliable to analyze gravity  
44 anomalies over basins having a limited thickness, whereas Chakravarthi and Rao (1993) have  
45 done in modeling and inversion of gravity anomalies with quadratic density function.

46 Particle swarm optimization (PSO) is a robust stochastic optimization technique based  
47 on the movement and intelligence of swarms, which was developed by James Kennedy and  
48 Russell Eberhart (1995). PSO applies the concept of social optimization in problem solving in  
49 various fields. In this paper, a Matlab code based on PSO is developed to interpret the gravity

50 anomalies of 2.5-D sedimentary basins, where the density varies parabolically with depth.  
 51 PSO analyzed results are consistent and more accurate with other techniques and also well  
 52 agreement significantly with borehole information.

53

## 54 Theory

55 In the Bott's approach, sedimentary basin is approximated by a series of vertical prisms. The  
 56 gravity anomaly  $g_b$  at any point on the profile AA' as shown in Figure 1.

$$57 \quad g_b = \sum_{j=2}^{N-1} g_j(x_l, 0) + Cx + D \quad (1)$$

58 The gravity effect of  $l^{\text{th}}$  prism is given as

$$59 \quad g(x_l, 0) = \int_{z=z_1}^{z_2} \int_{y=-a}^a \int_{x=-c}^c \frac{G\Delta\rho(z)zdx dy dz}{[(x-x_l)^2 + y^2 + z^2]^{3/2}} \quad (2)$$

60 The parabolic density function at any depth  $w$  is given by

$$61 \quad \Delta\rho(w) = \frac{\Delta\rho_0^3}{(\Delta\rho_0 - \alpha w)^2} \quad (3)$$

62 Finally, after integration of Chakravarthi and Sundararajan (2006), the equation (2) becomes

$$63 \quad g(x_l, 0) = -2G\Delta\rho_0^3 \left\{ \left\langle \frac{\alpha x_l L \left( \frac{1}{p_2} + \frac{1}{p_3} \right) \ln \frac{p_5}{p_6} + \frac{L}{2p_2} \ln \frac{(K+x_l)}{(K-x_l)} + \frac{x_l}{2p_3} \ln \frac{(K+L)}{(K-L)} + \right\rangle_{x_l-c}^{x_l+c} \right\rangle_{z_1}^{z_2} \quad (4)$$

$$\left\langle \frac{\Delta\rho_0}{\alpha} \left[ \frac{1}{p_2} \tan^{-1} \left( \frac{KL}{zx_l} \right) + \frac{1}{p_3} \tan^{-1} \left( \frac{x_l K}{zL} \right) \right] - \frac{1}{\alpha p_5} \tan^{-1} \left( \frac{Lx_l}{zL} \right) \right\rangle_{z_1}^{z_2}$$

64 Where,

$$65 \quad K = (x_l^2 + L^2 + z^2), p_1 = x_l^2 + L^2, p_2 = L^2 \alpha^2 + \Delta\rho_0^2,$$

$$66 \quad p_3 = x_l^2 + \Delta\rho_0^2, p_4 = \sqrt{(p_1 \alpha^2 + \Delta\rho_0^2)}, p_5 = \Delta\rho_0^2 - \alpha z \quad \text{and}$$

$$67 \quad p_6 = -2(\alpha K p_4 + p_1 \alpha^2 + \Delta\rho_0 \alpha z).$$

68 Here,  $N$  is the number of observations,  $G$  is the universal gravitational constant,  $C$  and  $D$  are  
 69 coefficients of regional background,  $c$  is half width of the prism,  $z_1$  and  $z_2$  are depths to the  
 70 top and bottom of the basin,  $2L$  is strike length of the prism,  $a$  is the offset of profile from the  
 71 center of the prism and  $\Delta\rho_0$  and  $\alpha$  are constants of the parabolic density function at depth  $z$ .

72 Since profile AA' does not pass through the centers of each prism, equation 4 has to  
 73 be calculated twice by putting  $L-a$  and  $L+a$  for  $L$  and taking the average. The initial depths of  
 74 the basin calculated using observed anomaly  $g_0$ , is given by as

$$75 \quad d_i = \frac{g_0(x_i)4\rho_0}{41.89\Delta\rho_0^2 + \alpha g_0(x_i)}, i = 2, 3, \dots, N-1 \quad (5)$$

76 Profile AA' entirely covers the lateral dimensions of the sedimentary basin, therefore the  
 77 depth of the basin on either side of the profile become zero. So,  $d_1 = 0 = d_N$

78

## 79 Particle Swarm Optimization

80 PSO uses a number of particles (solutions) that constitute a swarm, moving around in the  
 81 search space looking for the best solution. Each particle adjusts its "flying" according to its  
 82 own flying experience as well as the flying experience of other particles. Each particle keeps  
 83 track of its coordinates in the solution space which is associated with the best solution  
 84 (fitness) that has achieved so far by that particle. This value is called personal best, Pbest.  
 85 Another best value that is tracked by the PSO is the best value obtained so far by any particle  
 86 in the neighborhood of that particle. This value is called global best, Gbest. The basic idea of  
 87 PSO lies in accelerating each particle towards its Pbest and the Gbest locations with a random  
 88 weighted acceleration at each time step (Mohapatra and Das, 2013).

$$89 \quad V_t^k = w.V_t^{k-1} + c_1.rand_1.(Pbest_t - X_t^k) + c_2.rand_2.(Gbest - X_t^k) \quad (6)$$

$$90 \quad X_t^k = X_t^{k-1} + V_t^k \quad (7)$$

91 where  $k$  is the number of iterations;  $t$  is the particle number;  $V_t^k$  is the velocity of the  $t$ th  
92 particle at  $k$  iterations;  $X_t^k$  is the position of  $t$ th particle at  $k$  iterations;  $Pbest_t$  is the best  
93 position of individual  $t$ th particle (Local best position);  $Gbest$  is the best position of all  
94 particles (Global best position);  $rand_1$  and  $rand_2$  are the independent uniformly random  
95 numbers in the range  $[0,1]$ ;  $c_1$  and  $c_2$  are the positive learning factor which controls the  
96 maximum step length;  $w$  is the inertial weight factor that controls the speed of the particles.  
97 Equation (7) gives the updated velocity based on the current velocity, current position, local,  
98 best position and global best position. This process is repeated until the desired result is  
99 obtained. The schematic diagram/flow chart of PSO algorithm is shown in Figure 2.

100

## 101 **Examples**

102 The Matlab code based on PSO is applied to a synthetic model of a sedimentary basin and  
103 real field data sets from Gediz Graben, Western Anatolia and Godavari sub-basin, India.

104

## 105 **Synthetic Example**

106 We have used a synthetic gravity anomaly of  $45 \times 10^3$  m length at  $1 \times 10^3$  m station interval.

107 In Bott's algorithm, the prism will be of equal width of  $1 \times 10^3$  m but with different strike

108 lengths. Here parabolic density function is used with the constants  $\Delta\rho_0 = -0.65 \times 10^3$  Kg / m<sup>3</sup>

109 and  $\alpha = 0.04 \times 10^3$  Kg / m<sup>3</sup> per 1000 m. The profile does not bisect the strike lengths of prism

110 and so offset distance of the profile from the centre of each prism is mentioned in the code.

111 We have added an interference term,  $Ax+B$ , with  $A = -0.007$  mgal per 1000 m and  $B = -10$

112 mgal for the regional background. Required result is found at 15 iterations with RMS error of

113 2.9369e-006 from Marquardt algorithm.

114 We have used the same synthetic gravity anomaly for PSO algorithm. The Figure 3  
115 shows the learning process of Pbest and G Best in terms of error and iterations. The best  
116 result is found with 57 iterations and 50 numbers of models (Figure 3). So it is seen that after  
117 57 iterations and 50 models, the calculated anomalies match the synthetic anomaly and  
118 estimated depths coincide with the actual structure where RMS Error is 2.8383e-004.  
119 **Gaussian noises of 5% and 10% are added to the synthetic data to perceive the robustness of**  
120 **the PSO algorithm.** PSO does not find the true depths, but give values close to the true  
121 depths. The upper part of Figure 4 shows the synthetic and PSO calculated gravity anomalies  
122 of a synthetic model of a 2.5-D sedimentary basin and the lower part shows the inferred depth  
123 structure obtained from PSO and Marquardt algorithm for synthetic data. Figure 5 and  
124 Figure 6 shows the synthetic data with 5% and 10% Gaussian noises and calculated gravity  
125 anomalies obtained from PSO algorithm and inferred depth structure obtained by PSO and  
126 Marquardt algorithm.

127

## 128 **Field Example**

### 129 **Gediz Graben, Western Anatolia**

130 The first field case study of the interpretation of gravity anomalies has been taken from Gediz  
131 Graben, Western Anatolia. The PSO technique has been applied using 29 vertical prisms,  
132 each with equal width of  $2 \times 10^3$  m but with different strike length, whereas Chakravarthi and  
133 Sundararajan (2007) used same prism and interpreted gravity anomaly by Marquardt  
134 algorithm using a parabolic density function whose constants are  $\Delta\rho_0 = -1.407 \times 10^3 \text{ Kg / m}^3$   
135 and  $\alpha = 2.26935 \times 10^3 \text{ Kg / m}^3$  per 1000 m.. .

136 We have used a similar number of prisms in PSO to improve the results. So with 65  
137 iterations and 50 models, we achieve a good fit between observed and PSO analyzed gravity

138 anomalies with RMS error of 0.0083. The maximum thickness of the graben is inferred as  
139  $1.87 \times 10^3$  m that matches well with  $1.8 \times 10^3$  m as estimated by Sari and Salk (2002) as  
140 compared to  $1.64 \times 10^3$  m obtained by Chakravarthi and Sundararajan (2007). The upper part  
141 of Figure 7 shows the observed and PSO calculated gravity anomalies over Gediz Graben,  
142 Western Anatolia and the lower part show the inferred depth structure obtained from PSO  
143 and Marquardt algorithm.

144

#### 145 **Godavari sub-basin**

146 The Godavari sub-basin is one of the major basins of Pranhita-Godavari valleys (Rao, 1982),  
147 whose approximate strike length is  $220 \times 10^3$  m. The gravity profile is taken for study from  
148 the residual bouguer gravity anomaly map of the Godavari sub-basin as shown in Figure 8.  
149 We have used 29 vertical prisms, each with equal widths of  $2 \times 10^3$  m but with different  
150 strike length for sedimentary basin modeling. The constants of parabolic density functions  
151 used for Godavari sub-basin are  $\Delta\rho_0 = -0.5 \times 10^3$  Kg / m<sup>3</sup> and  $\alpha = 0.1518259 \times 10^3$  Kg / m<sup>3</sup>  
152 per 1000 m (Chakravarthi and Sundararajan, 2004). So with 71 iterations and 45 models, we  
153 achieve a good fit between observed and PSO analyzed gravity anomalies. The RMS error is  
154 0.0099. The maximum depth of the basin, obtained from PSO is  $4.09 \times 10^3$  m which is quite  
155 close to the borehole information (Agarwal, 1995). Chakravarthi and Sundararajan (2005)  
156 obtained maximum depth of  $4.0 \times 10^3$  m whereas Ramanamurthy and Parthasarathy (1988)  
157 suggested  $4.5 \times 10^3$  m as the thickness of the basin. The upper part of Figure 9 shows the  
158 variation of observed and PSO calculated gravity anomalies of Godavari sub-basin and the  
159 lower part shows the inferred structure obtained from PSO and Marquardt algorithm.

160

161

162 **Conclusions**

163 Particle swarm optimization (PSO) on Matlab environment is developed to estimate the  
164 model parameters of a 2.5-D sedimentary basin where the density contrast varies  
165 parabolically with depth. We have implemented the PSO algorithm on synthetic data with  
166 and without Gaussian noise and two field data sets. An observation has made that PSO is  
167 affected by some levels of noise, but estimated depths are close to the true depths. **The results**  
168 **obtained from PSO using synthetic and field gravity anomalies are well correlated with borehole**  
169 **samples and provide more geological viable.** Despite its long computation time, PSO is very  
170 simple to implement and is controlled by only one operator.

171

172 **Acknowledgements**

173 The authors express their sincere thanks to Prof. Dr. Lev Eppelbaum (Associate Editor),  
174 Dr. V. G. Gadirov (Referee) and one more anonymous referee for their constructive criticism  
175 leading to significant improvement in our manuscript. First author Mr. Kunal K. Singh thanks  
176 to IIT(ISM), Dhanbad (Jharkhand), India for providing the financial support to develop the  
177 infrastructre.

178

179 **References**

180 Agarwal, B.P., 1995. Hydrocarbon prospects of the Pranhita-Godavari Graben, India.  
181 Proceedings of Petrotech 95,115-121.  
182 Anecchione, M.A., Chouteau, M., Keating, P., 2001. Gravity interpretation of bedrock  
183 topography: the case of the Oak Ridges Moraine, Southern Ontario, Canada. Journal  
184 of Applied Geophysics 47, 63–81.



185 Barbosa, V.C.F., Silva, J.B.C., Medeiros, W.E., 1999. Stable inversion of gravity anomalies  
186 of sedimentary basins with non smooth basement reliefs and arbitrary density contrast  
187 variations. *Geophysics* 64, 754–764.

188 Bott, M.H.P., 1960. The use of rapid digital computing methods for direct gravity  
189 interpretation of sedimentary basins. *Geophysical Journal of the Royal Astronomical*  
190 *Society* 3, 63–67.

191 Bhattacharya, B. K., and Navolio, M. E., 1975. Digital convolution for computing gravity and  
192 magnetic anomalies due to arbitrary bodies, *Geophysics*, 40, 981-992.

193 Chakravarthi, V., and Rao, C. V., 1993. Parabolic density function in sedimentary basin  
194 modeling: 18th Annual Convention and Seminar on Exploration Geophysics,  
195 Expanded Abstracts, A16.

196 Chakravarthi, V., Sundararajan, N., 2004. Ridge regression algorithm for gravity inversion of  
197 fault structures with variable density. *Geophysics* 69 (6), 1394–1404.

198 Chakravarthi, V., Sundararajan, N., 2005. Gravity modeling of 2.5D sedimentary basins with  
199 density contrast varying with depth. *Computer and Geosciences* 31, 820-827.

200 Chakravarthi, V., Sundararajan, N., 2006. Gravity anomalies of 2.5D multiple prismatic  
201 structures with variable density: a Marquardt inversion. *Pure and Applied Geophysics*  
202 163, 229–242.

203 Chakravarthi, V., Sundararajan, N., 2007. INV2P5DSB-A code for gravity inversion of 2.5-D  
204 sedimentary basins using depth dependent density. *Computers and Geosciences* 33,  
205 449-456.

206 Cordell, L., 1973. Gravity analysis using an exponential density-depth function—San Jacinto  
207 Graben, California. *Geophysics* 38 (4), 684–690.

208 Eppelbaum, L.V. and Khesin, B.E., 2004. Advanced 3-D modelling of gravity field unmasks  
209 reserves of a pyrite-polymetallic deposit: A case study from the Greater Caucasus.  
210 First Break, 22, No. 11, 53-56.

211 Gadirov, V.G., Gadirov K.V., Gamidova, A.R., 2016. The deep structure of Yevlakh-  
212 Agjabedi depression of Azerbaijan on the gravity-magnetometer investigations,  
213 Geodynamics, 1(20), 133-143.

214 Gallardo-Delgado, L.A., Perez-Flores, M.A., Gomez-Trevino, E., 2003. A versatile algorithm  
215 for joint inversion of gravity and magnetic data. Geophysics 68, 949–959.

216 Garcia-Abdeslem, J., 2005. The gravitational attraction of a right rectangular prism with  
217 density varying with depth following a cubic polynomial. Geophysics 70, 39–42.

218 Kennedy, J., Eberhart, R., 1995. Particle Swarm Optimization: International Conference on  
219 Neural Network, IEEE, IV, 1942-1948.

220 Khesin, B.E., Alexeyev, V.V. and Eppelbaum, L.V., 1996. Interpretation of Geophysical  
221 Fields in Complicated Environments. Kluwer Academic Publishers (Springer), Ser.:  
222 Modern Approaches in Geophysics, Boston - Dordrecht - London, 368 p.

223 Litinsky, V. A., 1989. Concept of effective density: key to gravity depth determinations for  
224 sedimentary basins, Geophysics, 54, 1474-1482.

225 Marquardt, D.W., 1963. An algorithm for least squares estimation of nonlinear parameters.  
226 Journal Society Indian Applied Mathematics 11, 431–441.

227 Mohapatra, P., Das, S., 2013. Stock market prediction using bio-inspired computing: A  
228 survey. International journal of Engineering Science and Technology 5(4), 739-746.

229 Monteiro Santos, F.A., 2010. Inversion of self-potential of idealized bodies' anomalies using  
230 particle swarm optimization. Computers & Geosciences 36, 1185-1190.

231 Morgan, N. A., and Grant, F. S., 1963. High-speed calculation of gravity and magnetic  
232 profiles across two-dimensional bodies having an arbitrary cross-section, *Geophysical*  
233 *Prospecting*, 11, 10 -15.

234 Murthy, I.V.R., Rao, S.J., 1989. A FORTRAN 77 program for inverting gravity anomalies of  
235 two-dimensional basement structures. *Computers and Geosciences* 15, 1149–1156.

236 Murthy, I. V. R., Krishna, P. R., and Rao, S. J., 1988. A generalized computer program for  
237 two-dimensional gravity modeling of bodies with a flat top or a flat bottom or  
238 undulating over a mean depth, *Journal of Association of Exploration Geophysicists*, 9,  
239 93-103.

240 Rama Rao, B.S.R., Murthy, I.V.R., 1978. *Gravity and Magnetic Methods of Prospecting:*  
241 *Arnold-Heinemann Publishers, New Delhi, India, 390pp.*

242 Ramanamurty, B.V., Parthasarathy, E.V.R., 1988. On the evolution of the Godavari  
243 Gondwana Graben, based on LANDSAT Imagery interpretation. *Journal of the*  
244 *Geological Society of India* 32, 417–425.

245 Rao, C.S.R., 1982. Coal resources of Tamilnadu, Andhra Pradesh, Orissa and Maharashtra:  
246 *Bulletin of the Geological Survey of India* 2, 1-103.

247 Rao, C.V., Pramanik, A.G., Kumar, G.V.R.K., Raju, M.L., 1994. Gravity interpretation of  
248 sedimentary basins with hyperbolic density contrast. *Geophysical Prospecting* 42,  
249 825–839.

250 Rao, D. B., 1990. Analysis of gravity anomalies of sedimentary basins by an asymmetrical  
251 trapezoidal model with quadratic density function, *Geophysics*, 55, 226-231.

252 Sari, C., Salk, M., 2002. Analysis of gravity anomalies with hyperbolic density contrast: an  
253 application to the gravity data of Western Anatolia. *Journal of Balkan Geophysical*  
254 *Society* 5, 87–96.

255 Talwani, M., Worzel, J., Landisman, M., 1959. Rapid gravity computations for two  
256 dimensional bodies with application to the Mendocino submarine fracture zone.  
257 Journal of Geophysical Research 64 (1), 49–59.

258 Won, I. J., and Bevis, M., 1987. Computing the gravitational and magnetic anomalies due to  
259 a polygon: Algorithms and Fortran subroutines, Geophysics, 52, 232-238.

260

## 261 **Figure Captions**

262 Figure 1. The 2.5-D sedimentary basin and its approximation by juxtaposing prisms.

263 Figure 2. The detail schematic diagram/flow chart of PSO techniques.

264 Figure 3. Iteration verses RMS error of Pbest and Gbest using PSO technique through  
265 synthetic gravity anomaly.

266 Figure 4. Synthetic and Calculated gravity anomalies with parabolic density function due to a  
267 synthetic model of a 2.5-D sedimentary basin, obtained from PSO algorithm and  
268 inferred depth structure obtained from PSO and Marquardt algorithm.

269 Figure 5. Synthetic data with 5% Gaussian noise and calculated gravity anomalies obtained  
270 from PSO algorithm and inferred depth structure obtained from PSO and Marquardt  
271 algorithm.

272 Figure 6. Synthetic data with 10% Gaussian noise and calculated gravity anomalies obtained  
273 from PSO algorithm and inferred depth structure obtained for PSO algorithm and  
274 Marquardt algorithm.

275 Figure 7. Observed and calculated gravity anomalies with parabolic density function, Gediz  
276 Graben, Western Anatolia obtained from PSO algorithm and Inferred structure  
277 obtained from PSO and Marquardt algorithm.

278 Figure 8. Residual bouguer gravity anomaly map of Godavari sub-basin (modified after  
279 Chakravarthi and Sundararajan, 2005) and gravity anomaly profile taken for study.

280 Figure 9. Observed and calculated residual bouguer gravity anomalies of parabolic density  
281 function of Godavari sub-basin obtained from PSO algorithm and inferred depth  
282 structure from PSO and Marquardt algorithm.

283

284

285

286

287

288

289

290

291

292

293

294

295

296

297

298

299

300

301

302

303

304

305  
306  
307  
308  
309  
310  
311  
312  
313  
314  
315  
316  
317  
318  
319  
320  
321  
322  
323  
324  
325  
326  
327  
328  
329

Figure 1

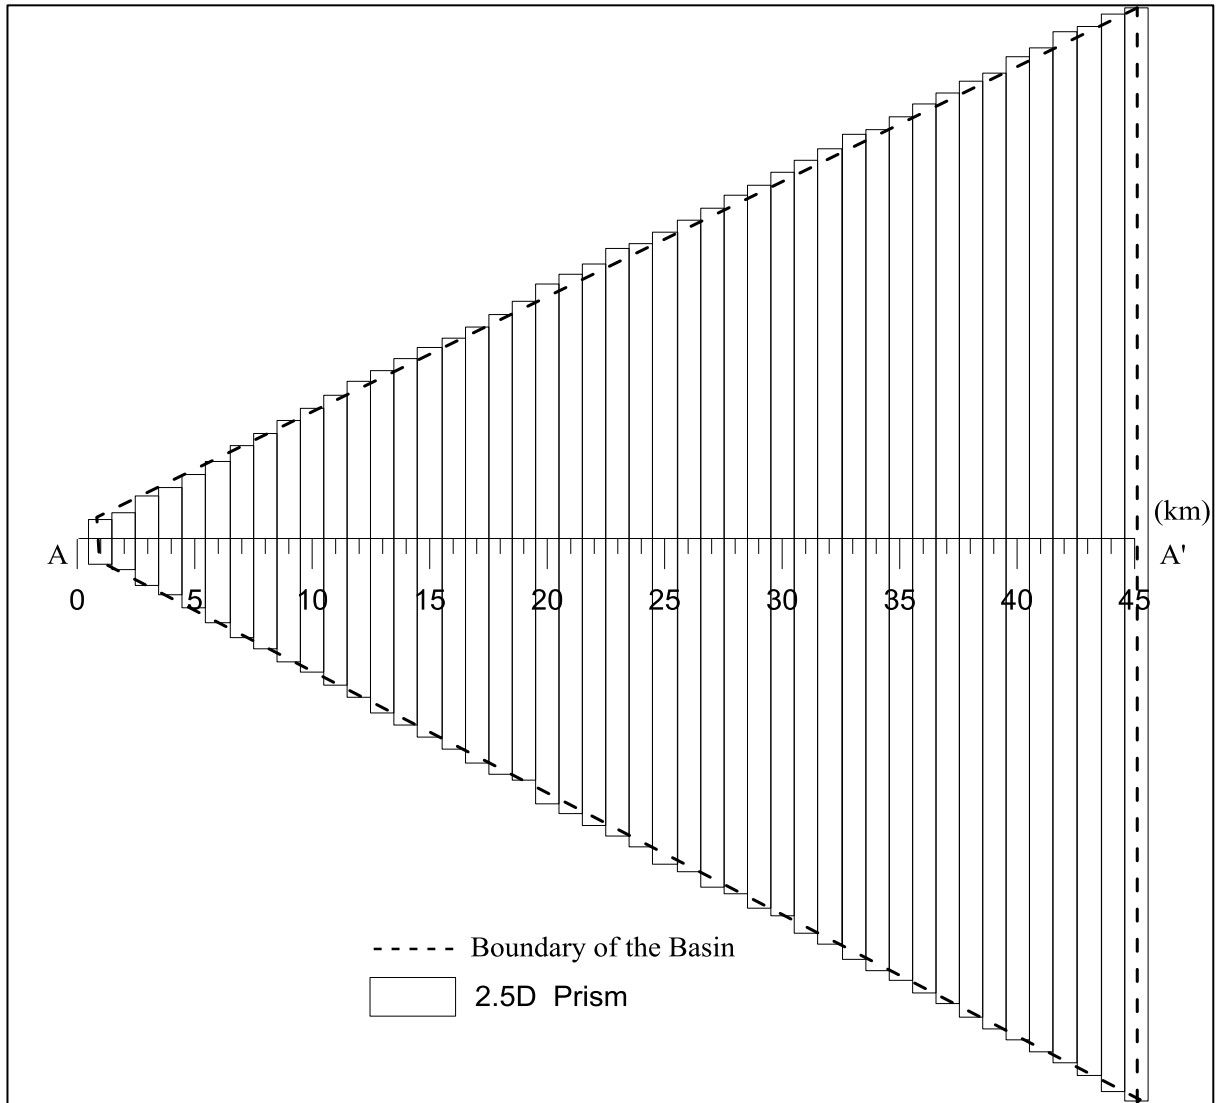

Figure 2

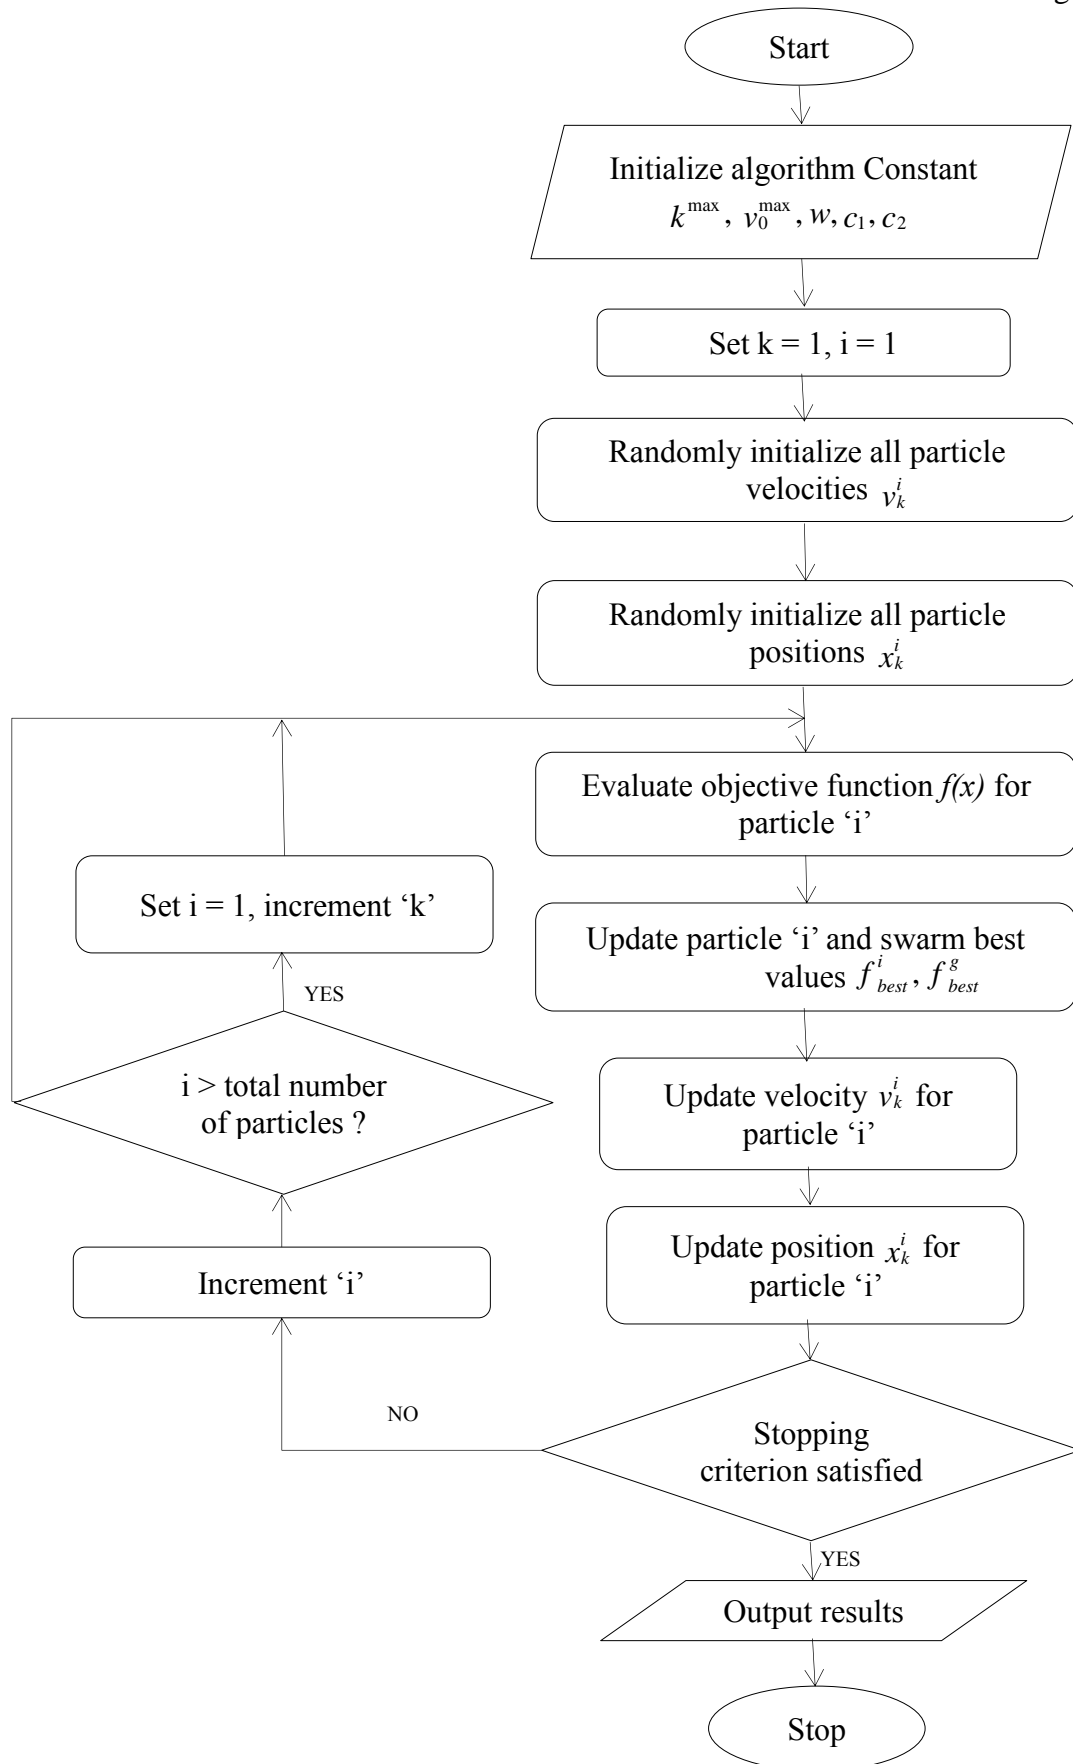

330  
331  
332  
333  
334  
335  
336  
337  
338  
339  
340  
341  
342  
343  
344  
345  
346  
347  
348  
349  
350  
351  
352  
353  
354

355  
356  
357  
358  
359  
360  
361  
362  
363  
364  
365  
366  
367  
368  
369  
370  
371  
372  
373  
374  
375  
376  
377  
378  
379

Figure 3

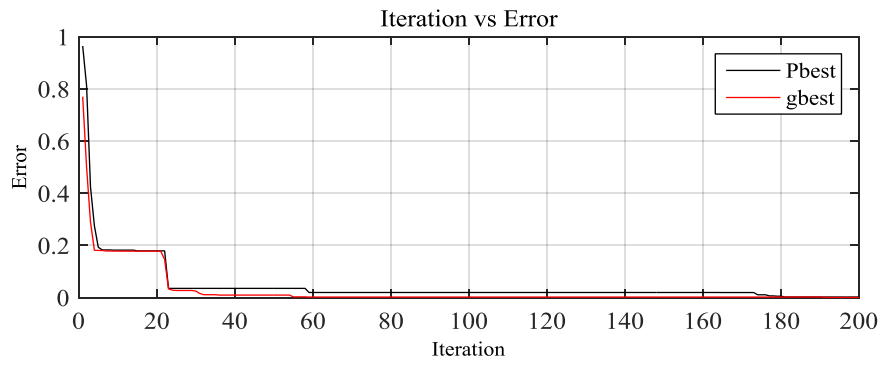



Figure 4

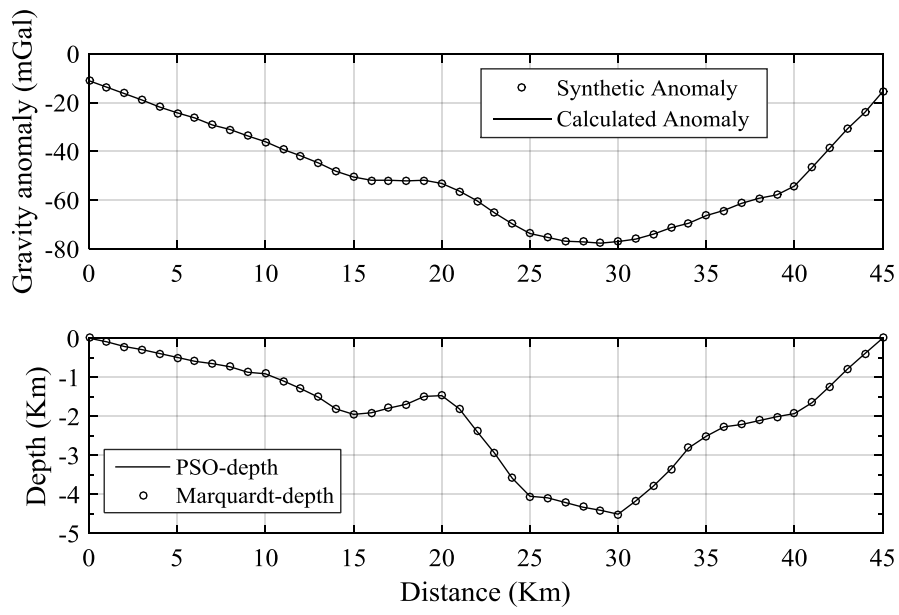

380  
381  
382  
383  
384  
385  
386  
387  
388  
389  
390  
391  
392  
393  
394  
395  
396  
397  
398  
399  
400  
401  
402  
403  
404

Figure 5

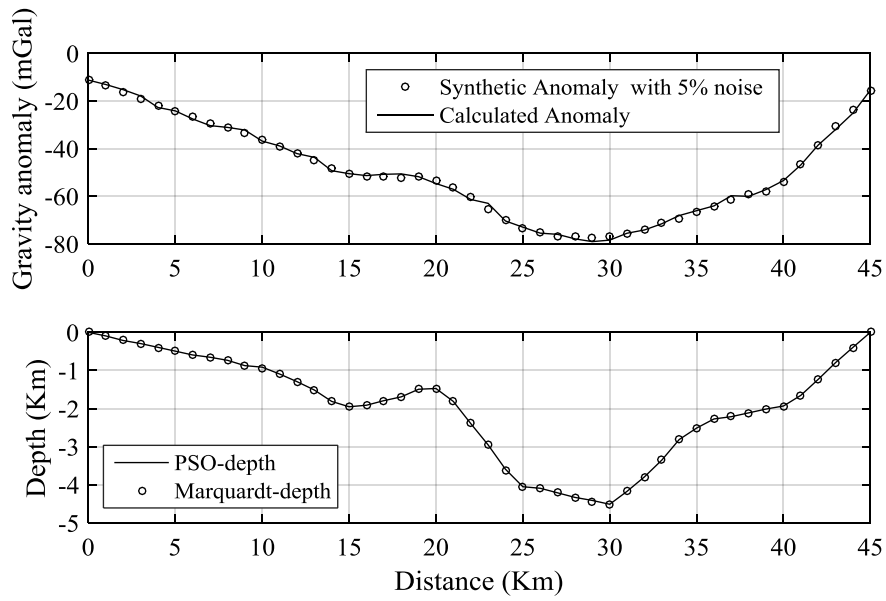

405  
406  
407  
408  
409  
410  
411  
412  
413  
414  
415  
416  
417  
418  
419  
420  
421  
422  
423  
424  
425  
426  
427  
428  
429

Figure 6

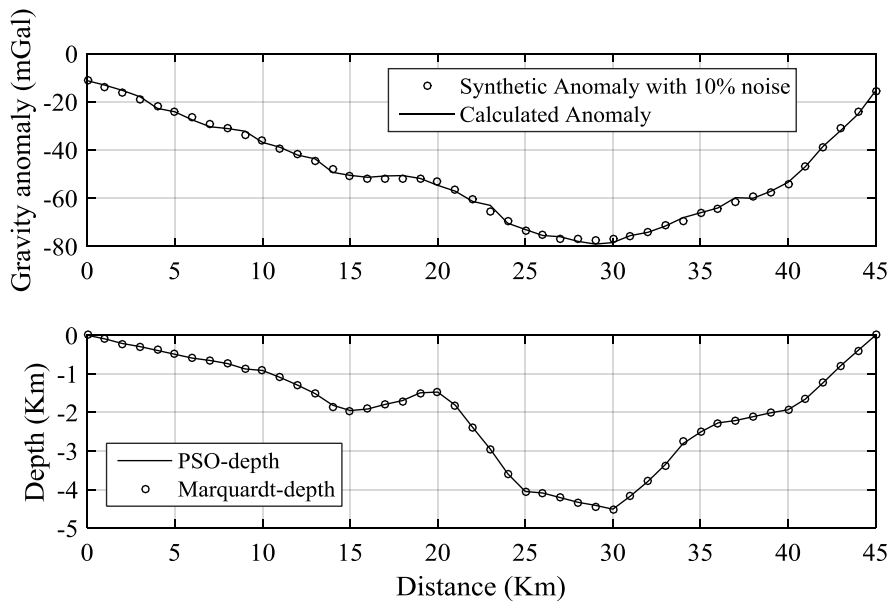

430  
431  
432  
433  
434  
435  
436  
437  
438  
439  
440  
441  
442  
443  
444  
445  
446  
447  
448  
449  
450  
451  
452  
453  
454

Figure 7

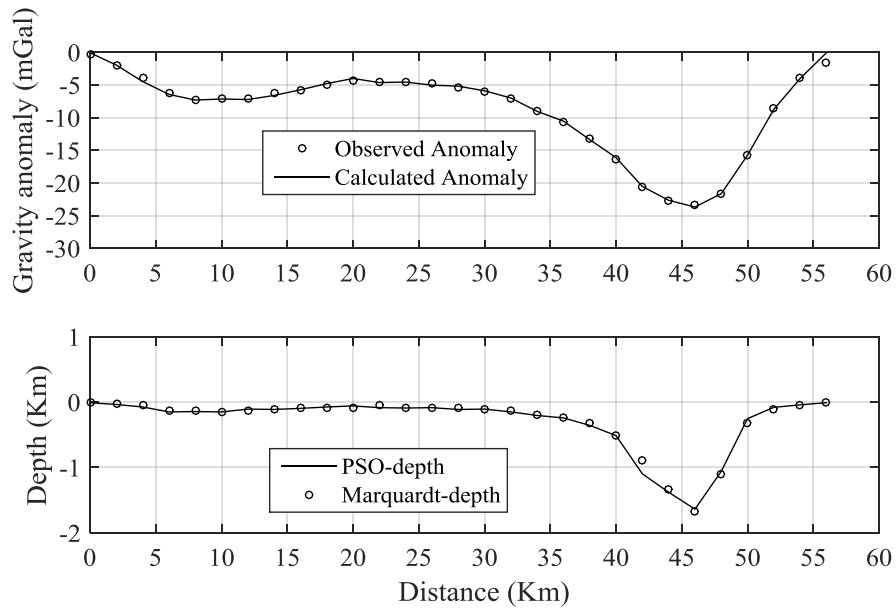

455  
456  
457  
458  
459  
460  
461  
462  
463  
464  
465  
466  
467  
468  
469  
470  
471  
472  
473  
474  
475  
476  
477  
478  
479

Figure 8

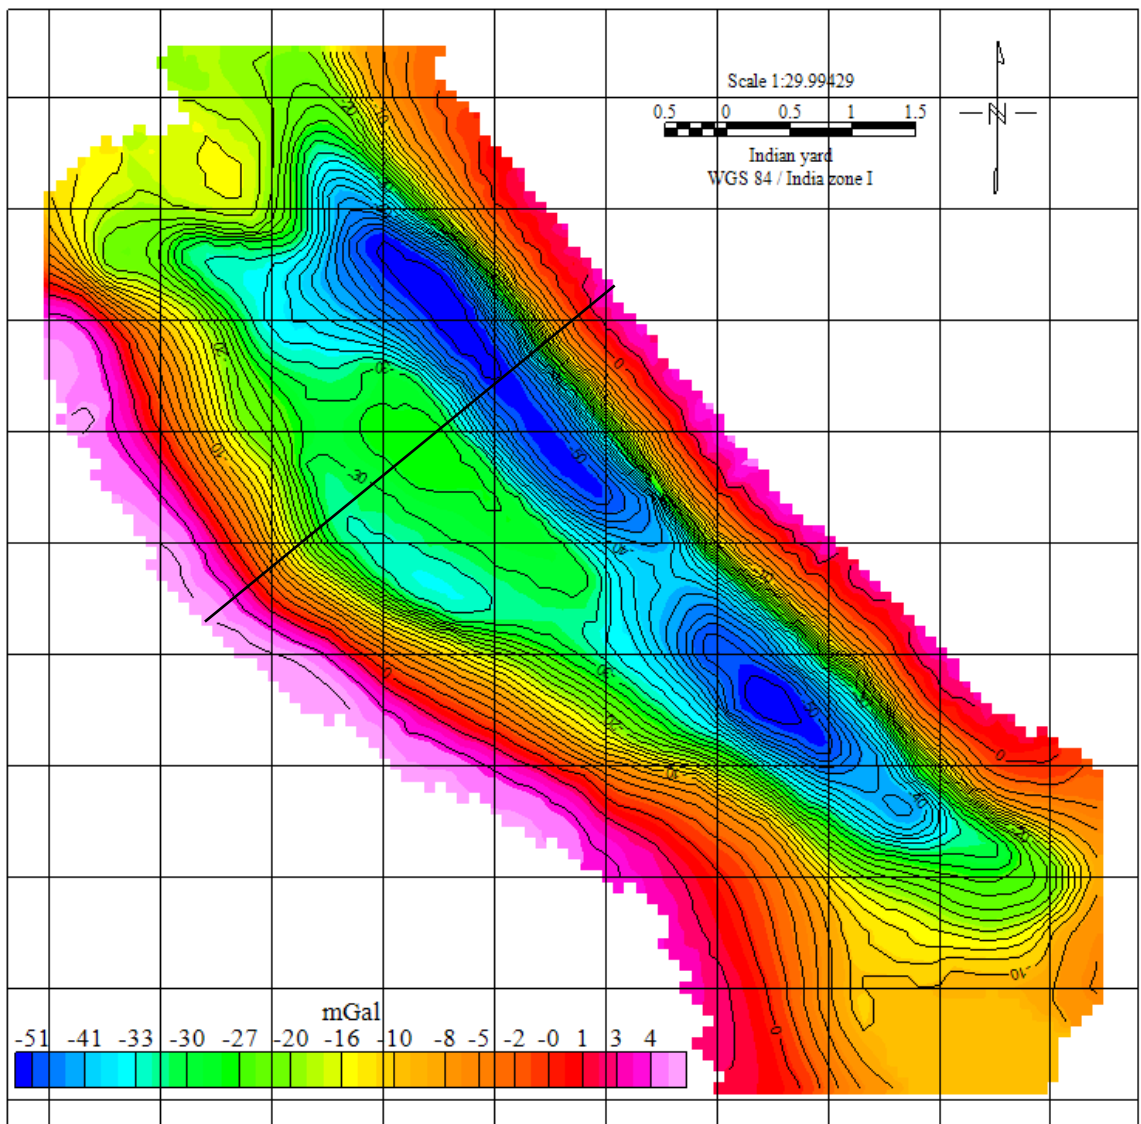

480  
481  
482  
483  
484  
485  
486  
487  
488  
489  
490  
491  
492  
493  
494  
495  
496  
497  
498  
499  
500  
501  
502  
503  
504

Figure 9

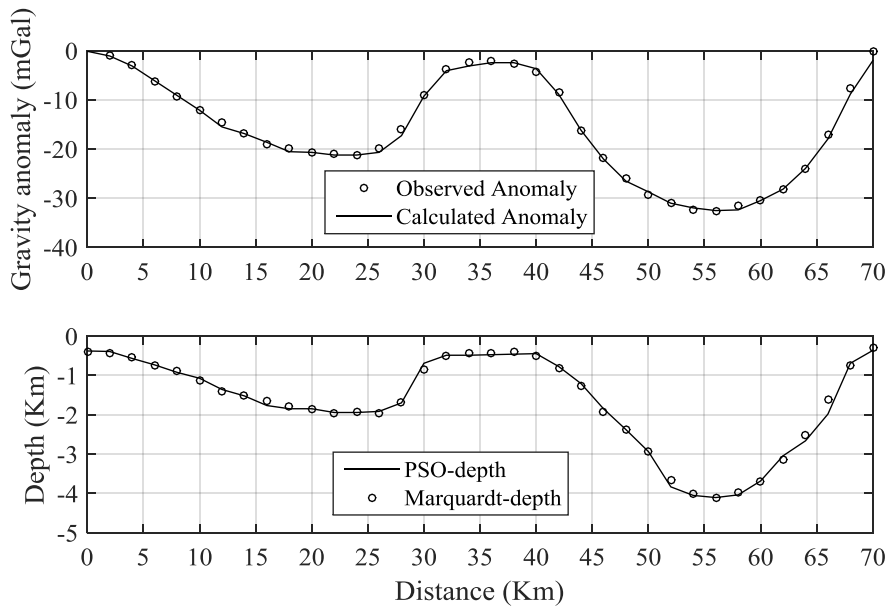

505  
506  
507  
508  
509  
510  
511  
512  
513  
514  
515  
516  
517  
518  
519  
520  
521  
522  
523  
524  
525  
526  
527  
528
