# Supplementary figures and images for: Application of particle swarm optimization for gravity inversion of 2.5-D sedimentary basins using variable density contrast
Source: Copernicus journal article supplement (doi:10.5194/gi-2016-10), 2016-08-25

Figure 1

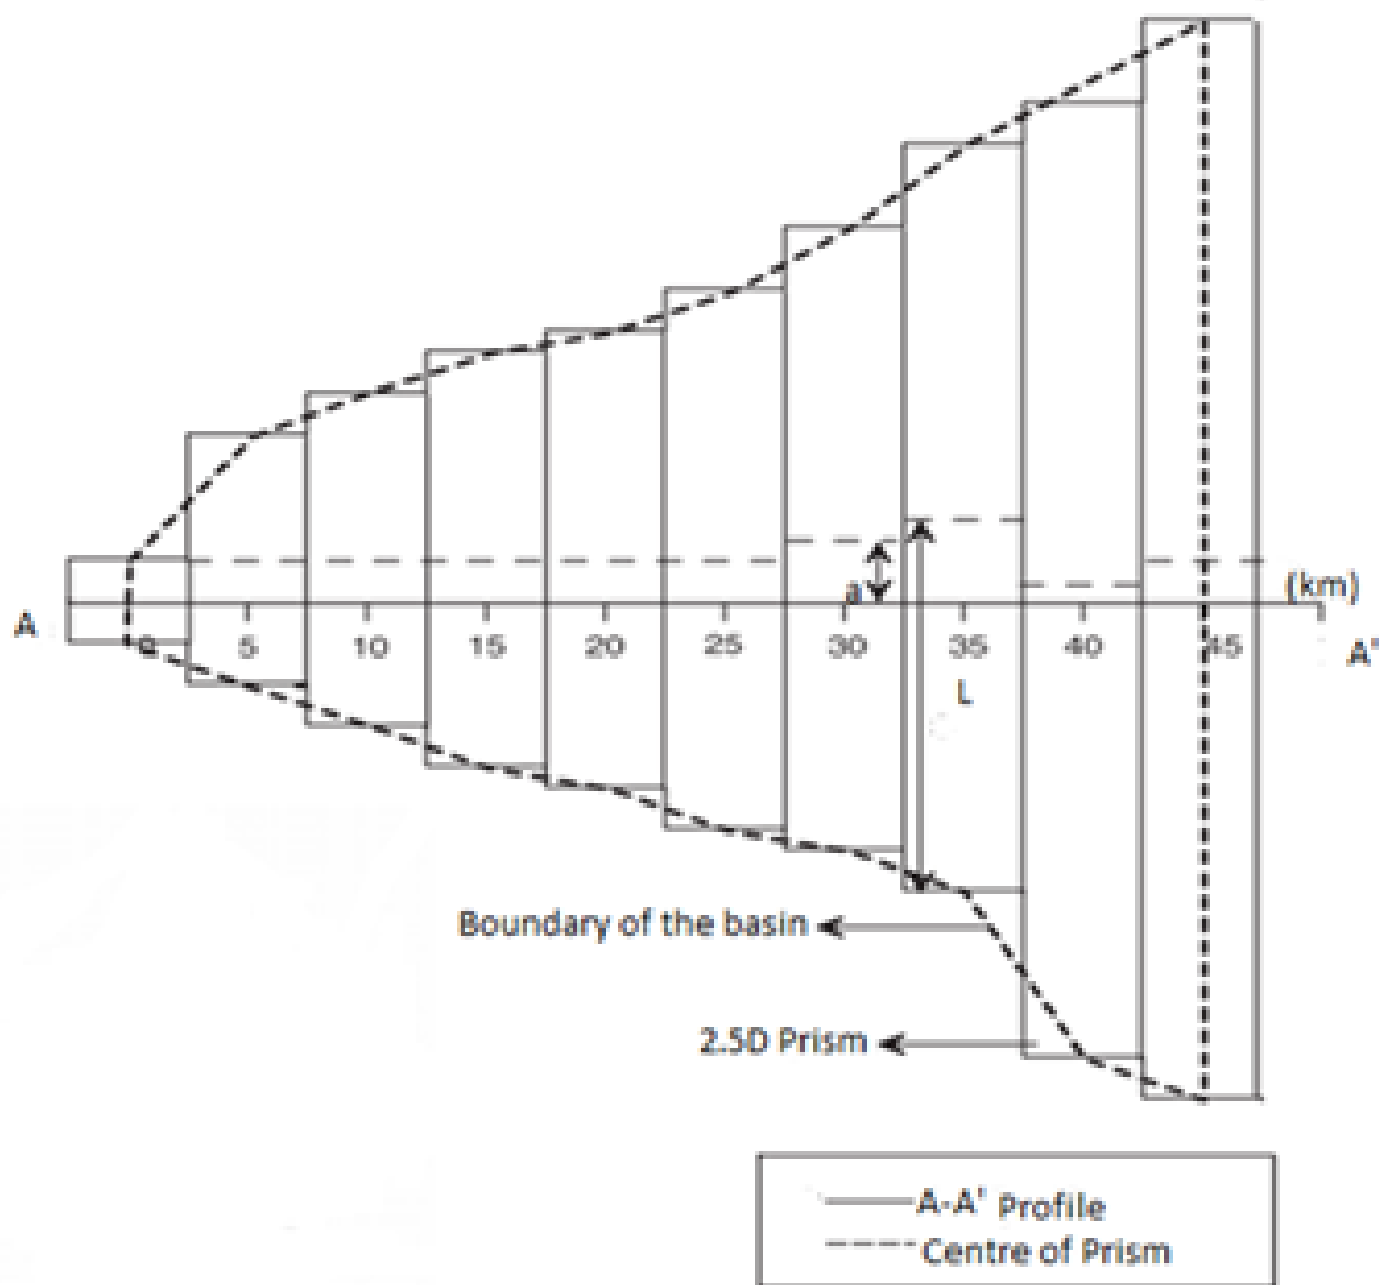

Figure 2

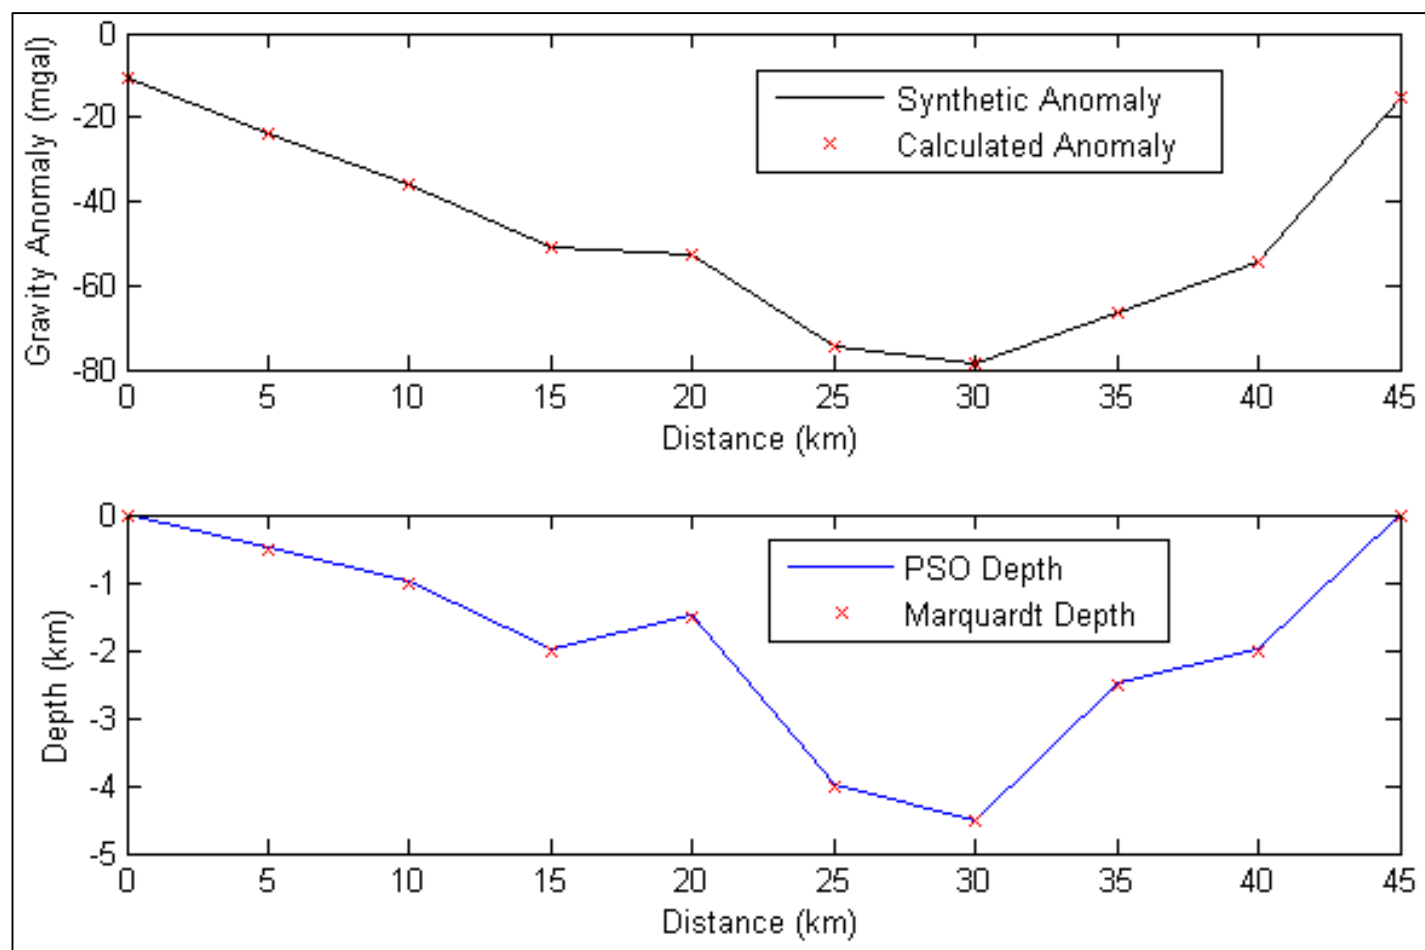

Figure 3

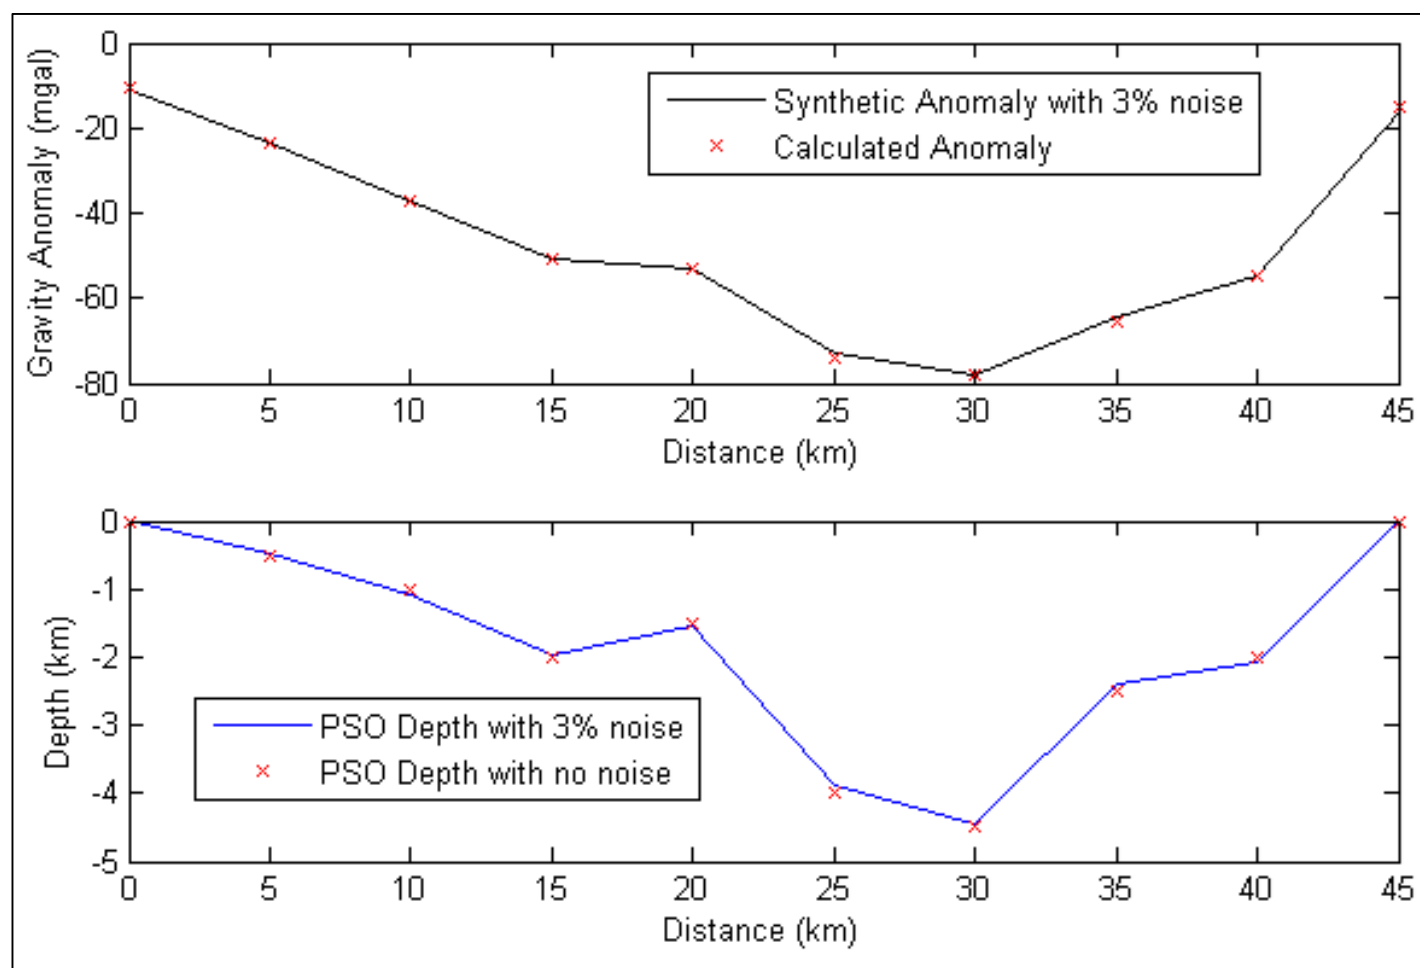

Figure 4

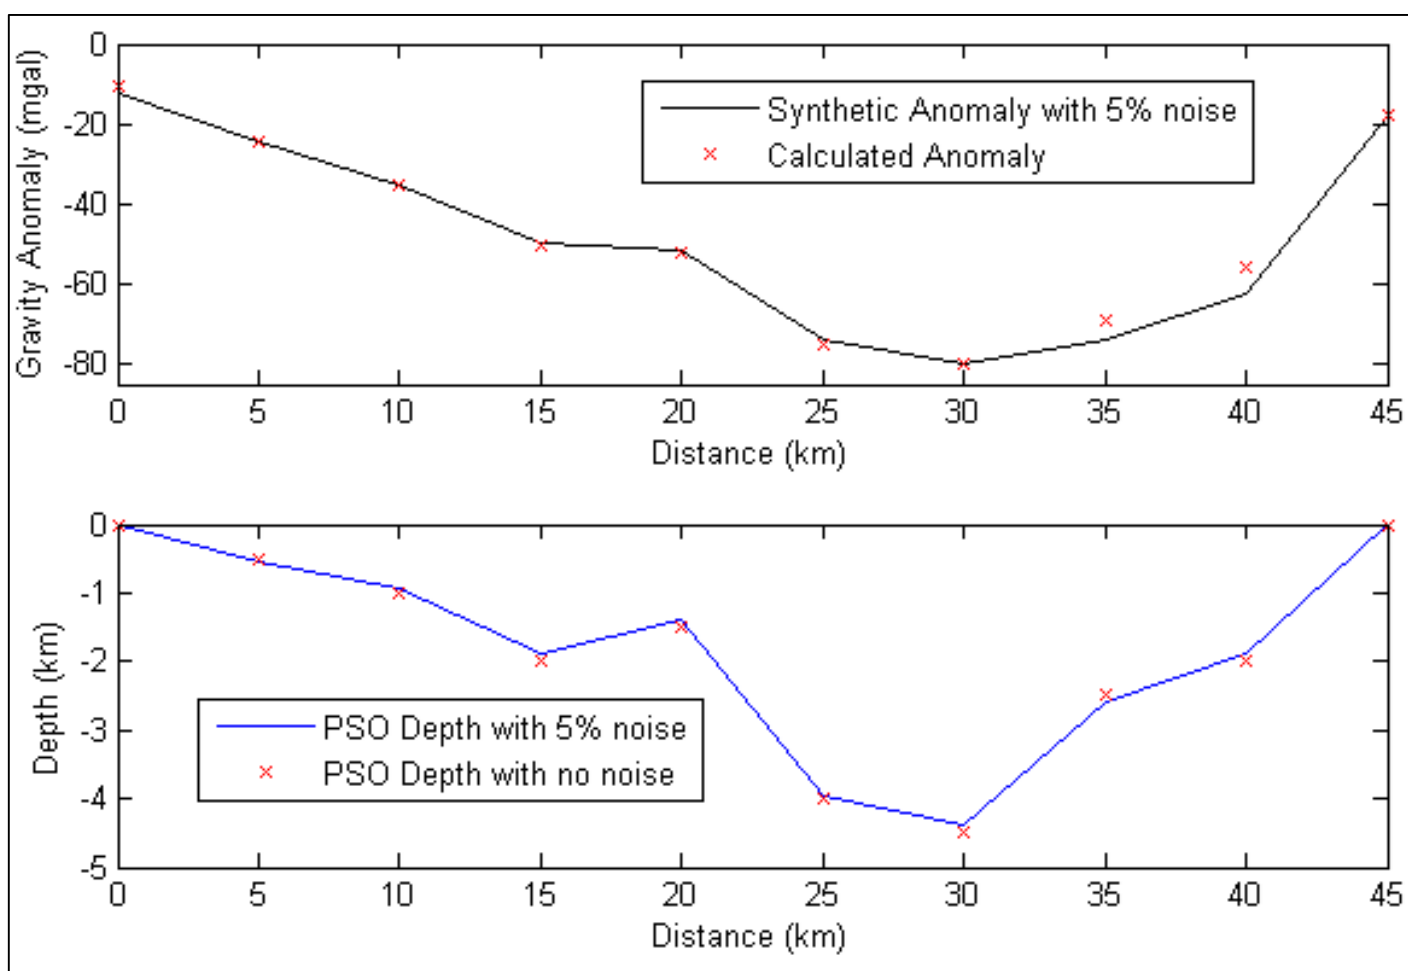

Figure 5

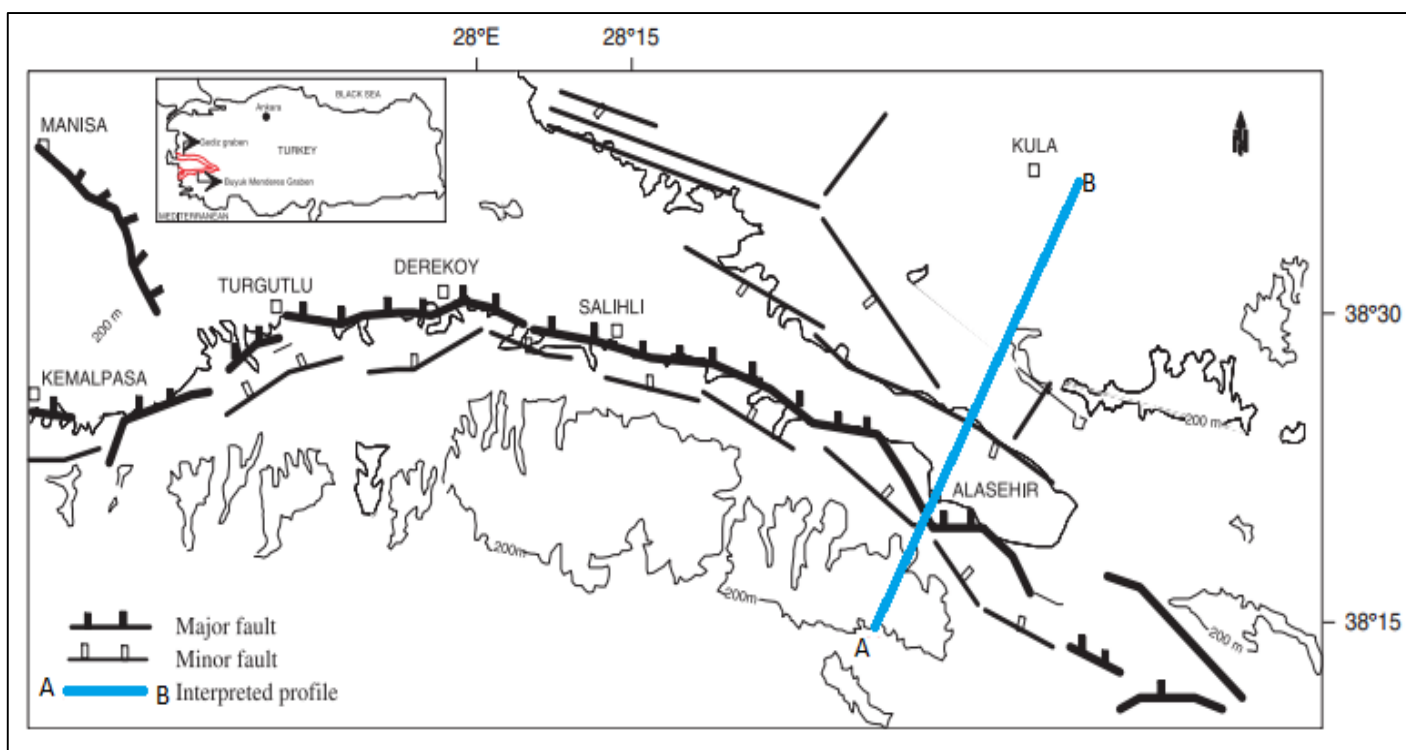

Figure 6

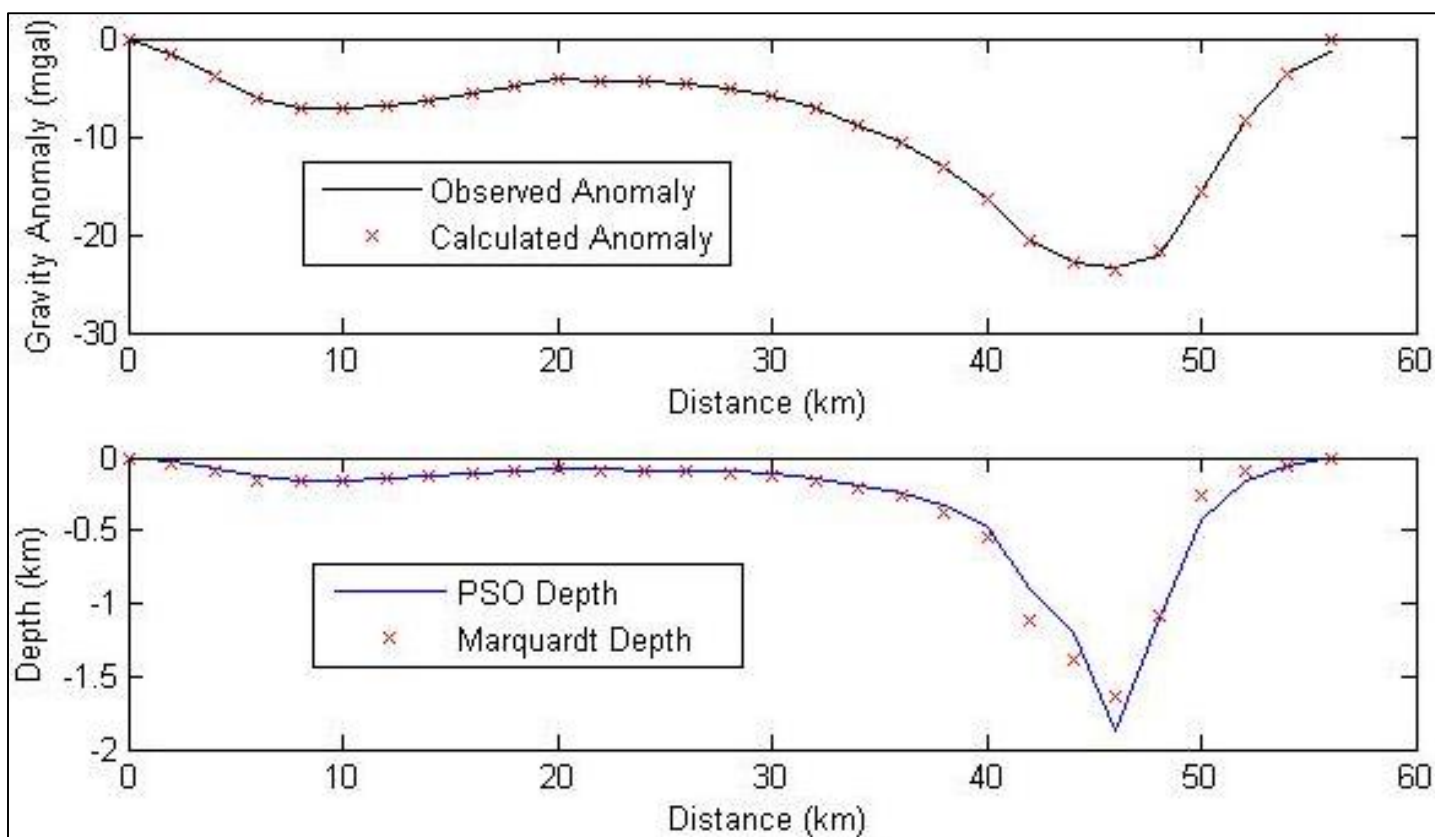

Figure 7

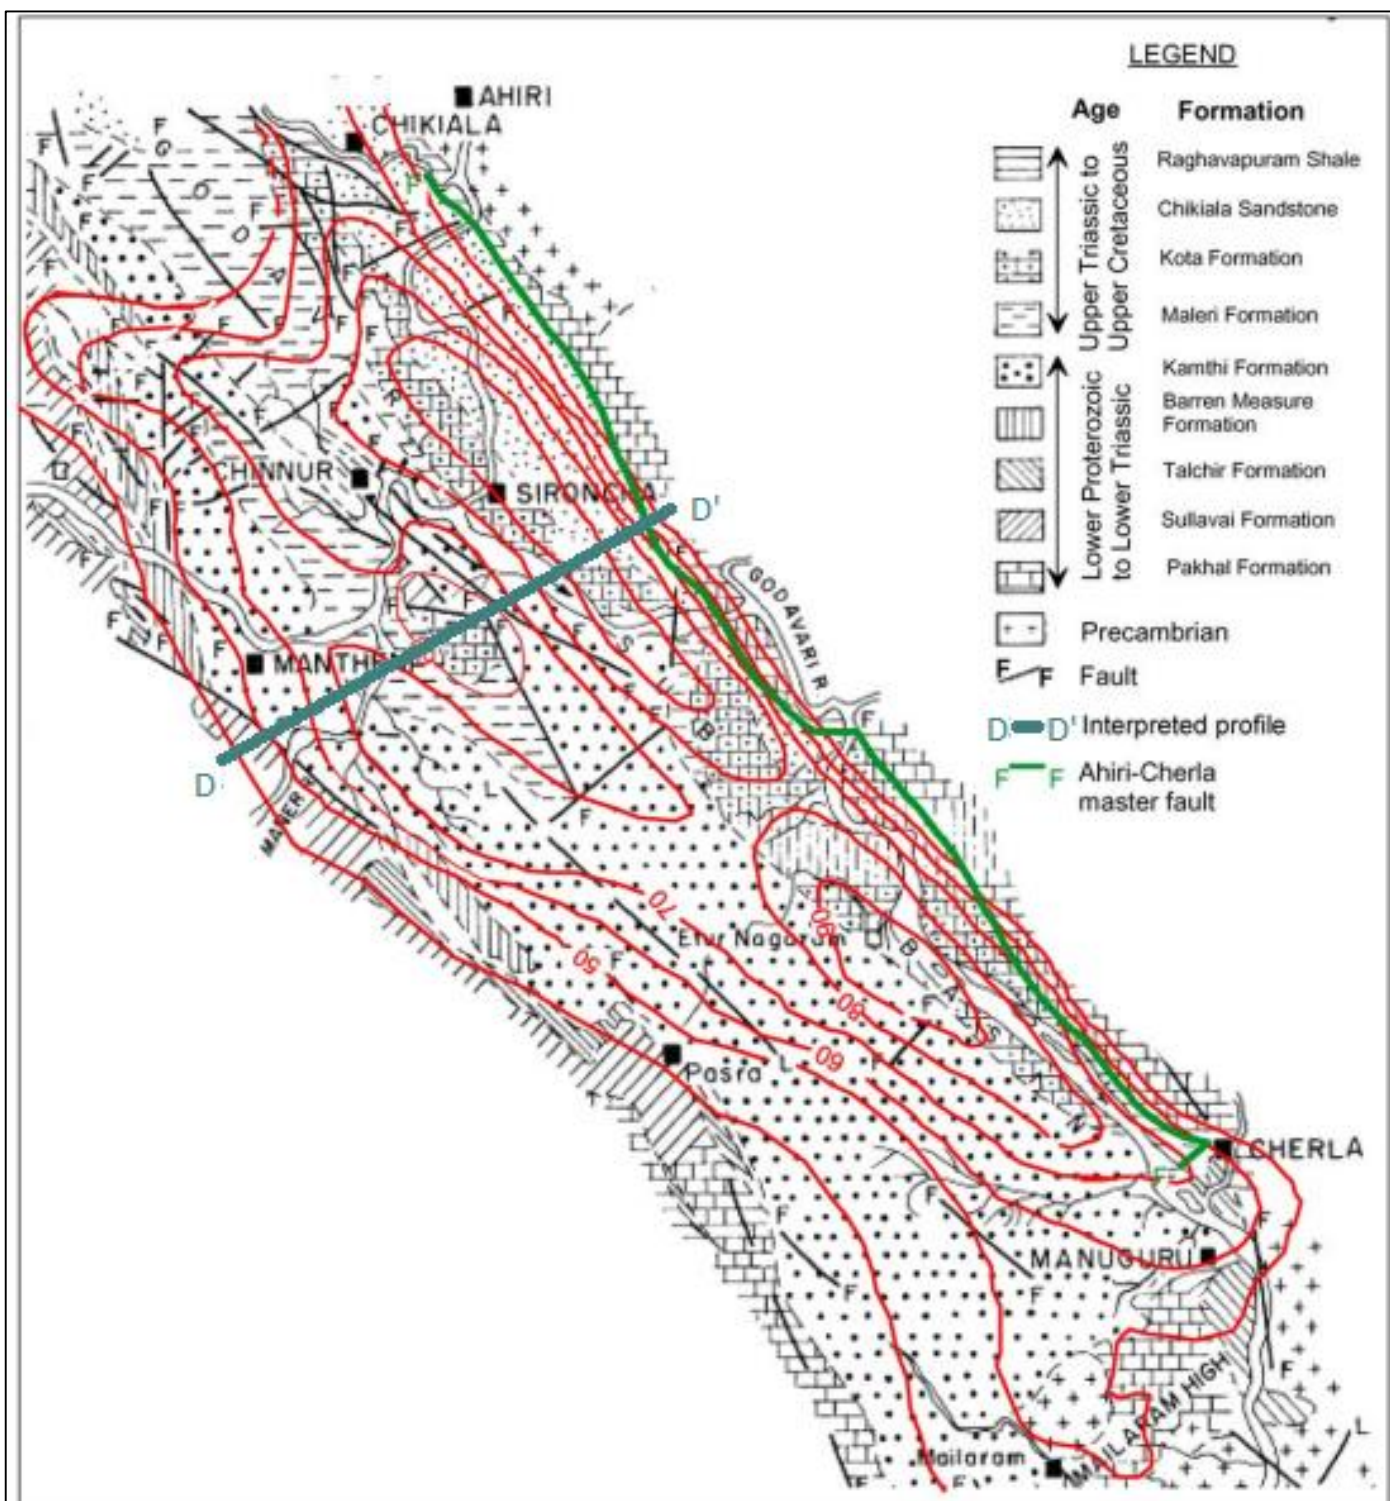

Figure 8

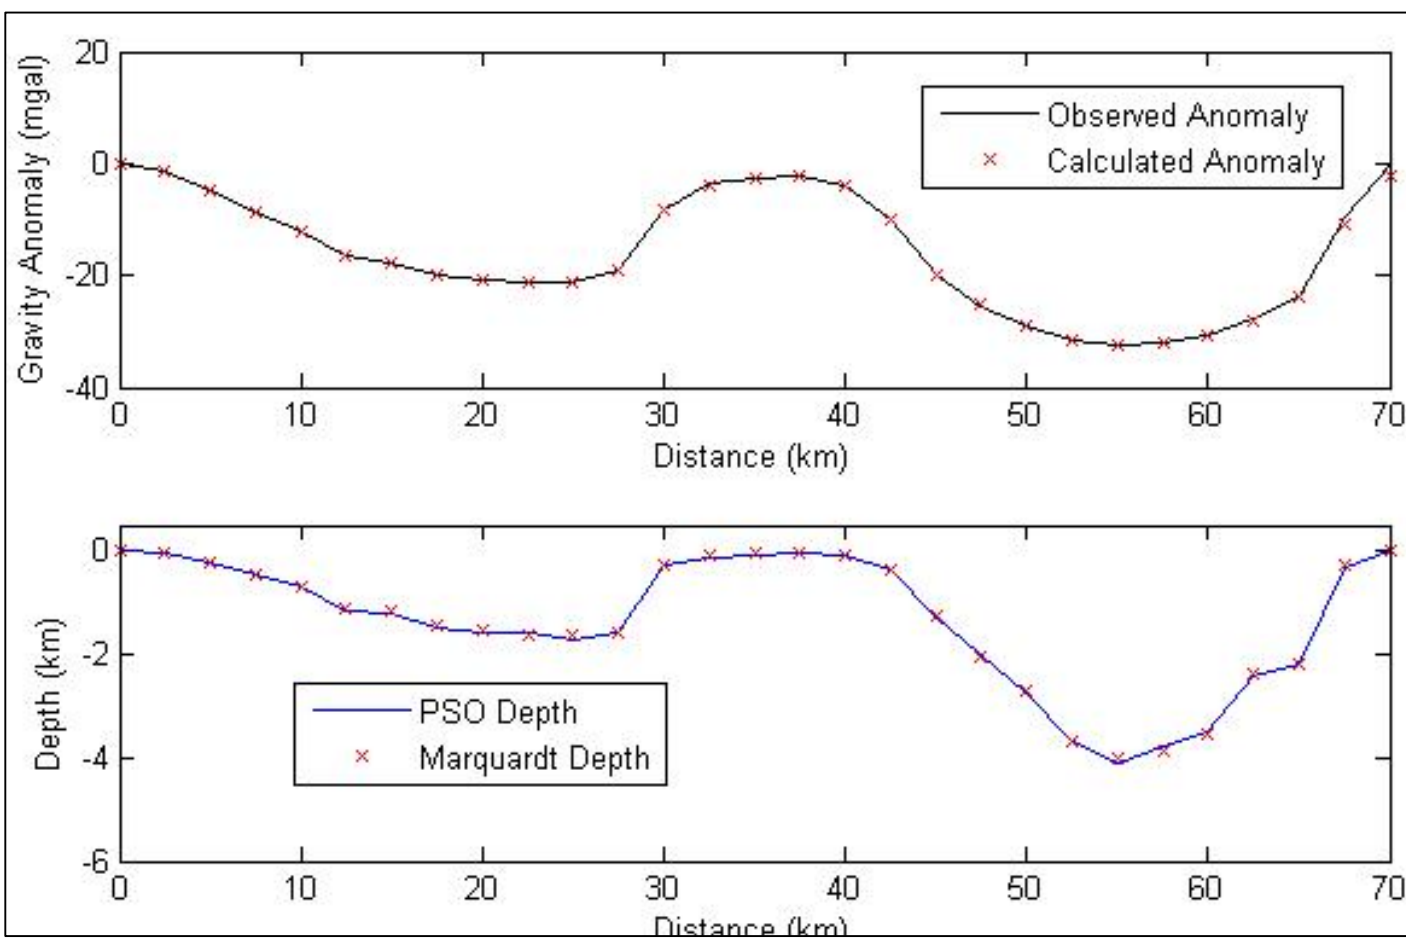

Supplement: Supplementary file 1 [file gi-2016-10-supplement.pdf]
